# Supplementary material for: The chromatin factor ROW cooperates with BEAF‐32 in regulating long‐range inducible genes
Source: PubMed Central journal article supplement — EMBO Rep. 2022 Oct 17;23(12):e54720. doi: 10.15252/embr.202254720 (PMC9724677; doi:10.15252/embr.202254720), 2022-10-17
Supplement: EMBR-23-e54720-s017.pdf [file EMBR-23-e54720-s017.pdf]

# Appendix

## The chromatin factor ROW cooperates with BEAF-32 in regulating long-range inducible genes

Neta Herman, Sebastian Kadener and Sagiv Shifman

### Table of content

Appendix Figure S1 .....page 2

Appendix Figure S2 .....page 3

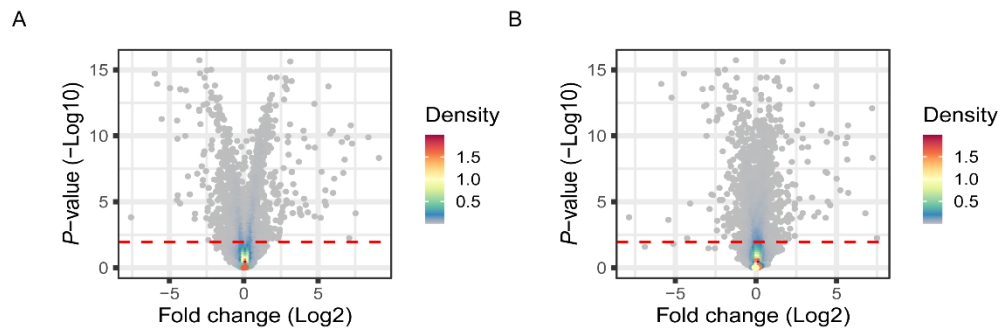

**Appendix Figure S1 Volcano plots for the differential expression analysis in fly heads**

(A-B) Volcano plot of the  $P$ -values ( $-\log_{10}$ ) as a function of the gene expression fold change ( $\log_2$ ) in (A)  $row^{RNAi-1}$  ( $n=3$  biological replicates) and (B)  $row^{RNAi-2}$  ( $n=2$ , biological replicates) relative to *Act-GAL4* control flies ( $n=3$  biological replicates).

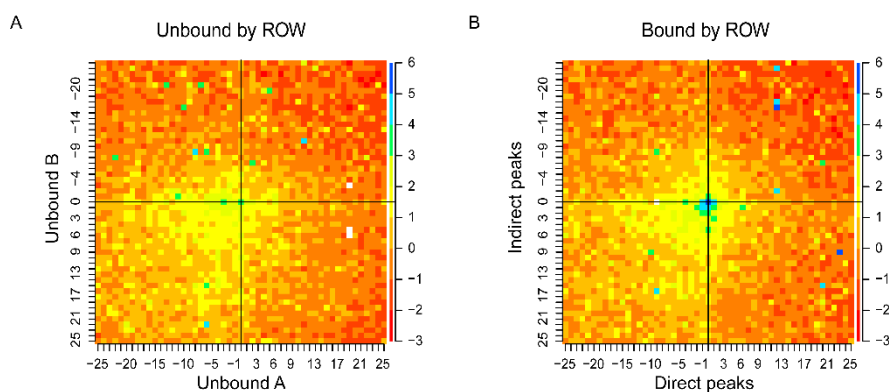

### Appendix Figure S2. Hi-C plots with a matched level of expression

(A-B) A plot of aggregated Hi-C sub-matrices of (A) random sets of promoters unbound by ROW, and (B) random sets of promoters bound directly and indirectly by ROW with matched gene expression levels (mean of  $n=100$  random choices). The plots show the promoters in the center within a region of 50kb divided into 50 bins (bin size = 1kb). The values are Z-scores of observed/expected values. The middle region on (B) shows higher values indicating higher levels of long-range interactions between promoters bound directly and indirectly by ROW.
