# Supplementary figures and images for: The chromatin factor ROW cooperates with BEAF‐32 in regulating long‐range inducible genes
Source: PubMed Central journal article supplement — EMBO Rep. 2022 Oct 17;23(12):e54720. doi: 10.15252/embr.202254720 (PMC9724677; doi:10.15252/embr.202254720), 2022-10-17

Corresponding to Figure 3A

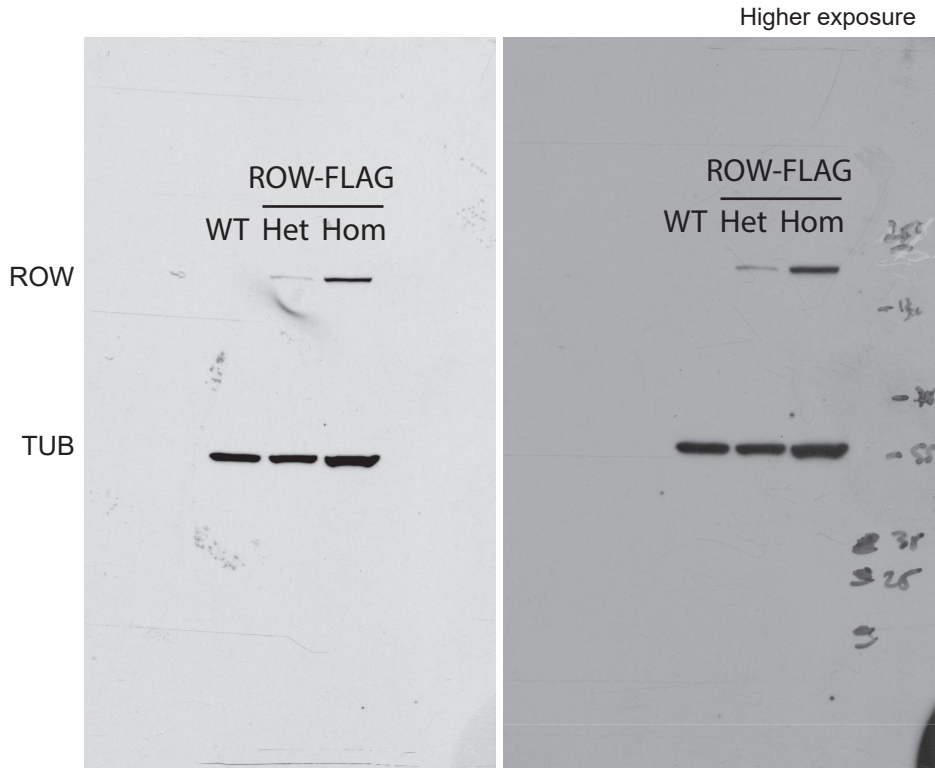

Corresponding to Figure 3D

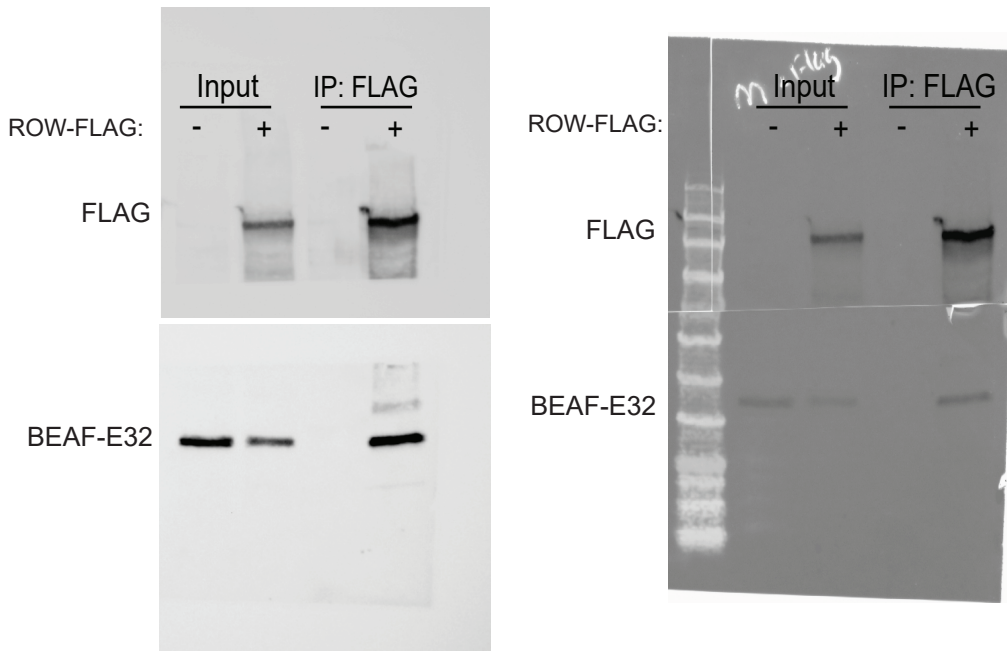

Supplement: EMBR-23-e54720-s005.pdf [file EMBR-23-e54720-s005.pdf]

# Corresponding to Figure 5B

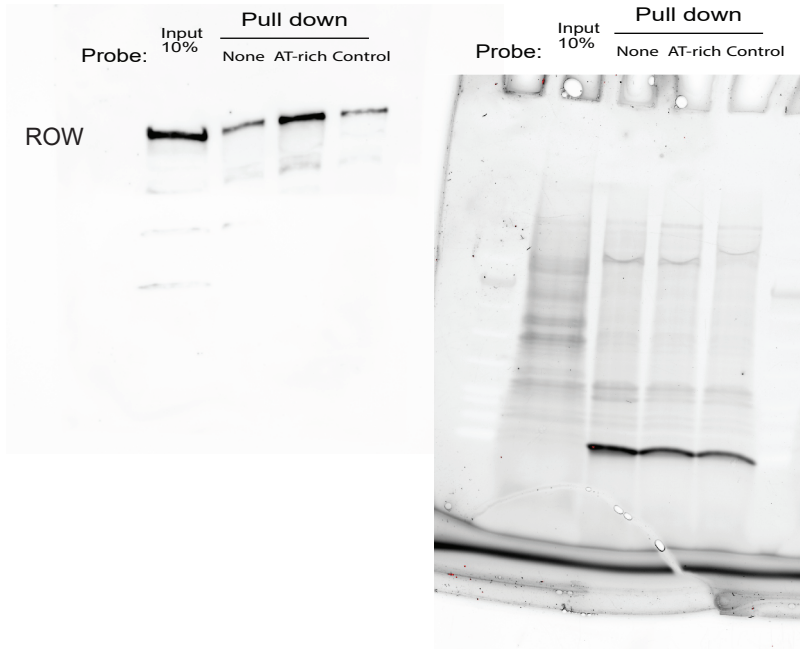

Corresponding to Figure 5E

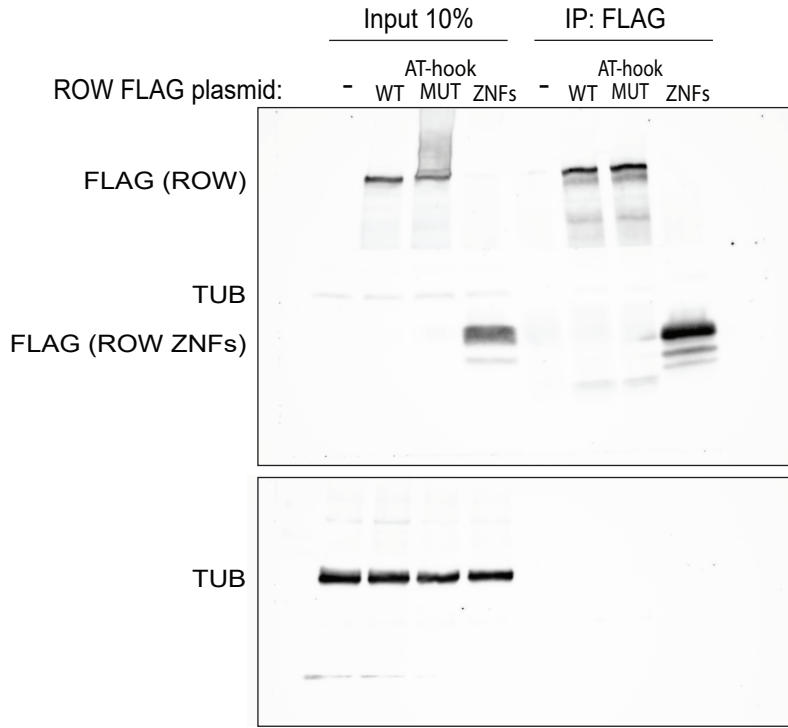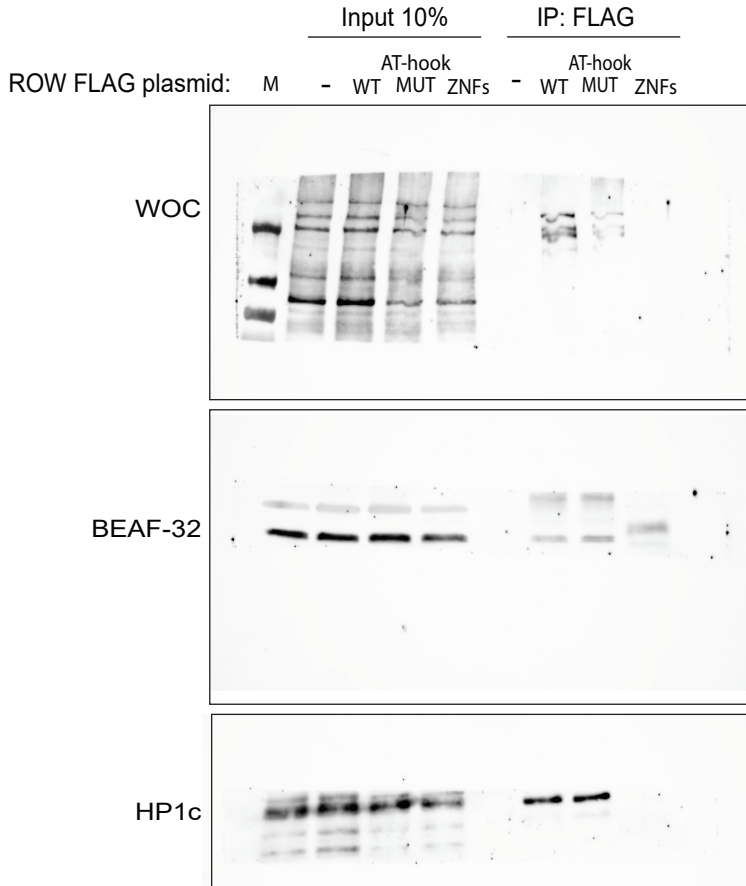

Supplement: EMBR-23-e54720-s012.pdf [file EMBR-23-e54720-s012.pdf]

# Corresponding to Figure 1A

Males

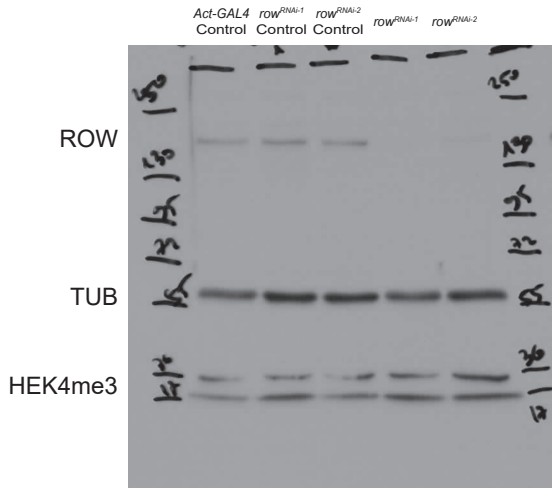

Females

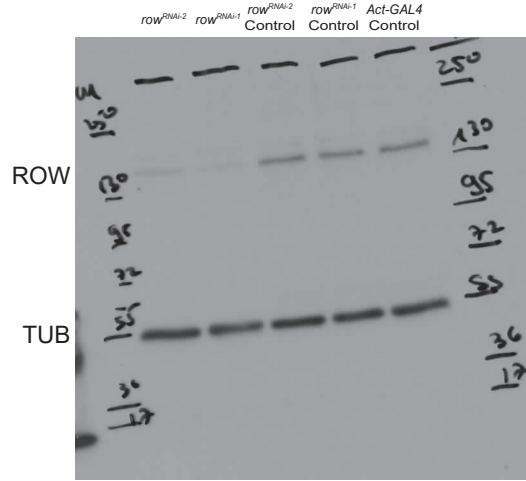

# Increased exposure time

Males

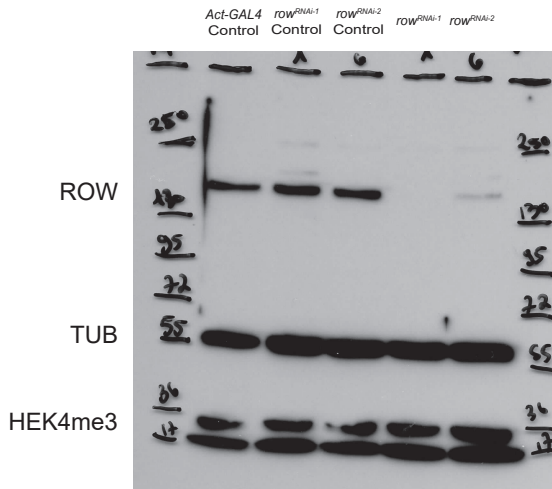

Females

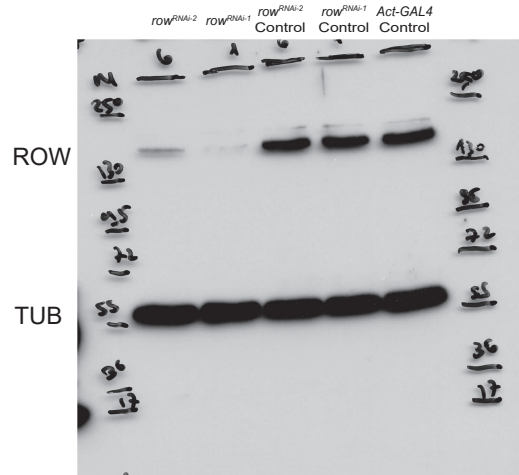

Supplement: EMBR-23-e54720-s015.pdf [file EMBR-23-e54720-s015.pdf]
